# Supplementary material for: The Effect of Selective Decontamination on Antimicrobial Resistance in Intensive Care Patients: A Systematic Review and Meta-analysis
Source: Research Square preprint supplement (doi:10.21203/rs.3.rs-5368003/v1), 2024-12-18
Supplement: Supplementary file 1 [file f4b397eb2d6f1e058eaf0180.docx]

**APPENDIX**

| **Index** |  |
| --- | --- |
| Figure 1: Search | 2 |
|  |  |
| Table 1: Details on reason of exclusion |  |
| A Reason of exclusion in meta-analysis of studies that are included in the systematic review | 3 |
| B Reason of exclusion of studies from systematic review and meta-analysis after full-text assessment | 4 |
|  |  |
| Table 2: Nature of Antibiotics administered |  |
| A Topical agents | 6 |
| B Systemic agents | 9 |
|  |  |
| Figure 2: Risk of bias assessment | 12 |
|  |  |
| Table 3: Definition of multidrug resistance in studies included in meta-analysis | 13 |
|  |  |
| Figures 3-9: Sensitivity analyses | 14 |
|  |  |
| Figure 10: Funnelplot | 21 |
|  |  |
| Figure 11: Visual inference | 22 |

| Fig. 1 Search terms used in Medline, Embase, and Cochrane |
| --- |
| 1. Intensive Care Units [Mesh] 2. High dependency unit* 3. High dependency ward* 4. Burn Unit* 5. Coronary Care Unit* 6. Intensive Care Unit* 7. Recovery Room* 8. Respiratory Care Unit* 9. ICU* 10. Critical care Unit 11. 1 or 2 or 3 or 4 or 5 or 6 or 7 or 8 or 9 or 10 12. Antibiotic Prophylaxis [Mesh] 13. Antibiotic prophylaxis 14. Antibiotic premedicat* 15. Digestive decontaminat* 16. Oral decontaminat* 17. Oropharyngeal decontaminat* 18. Gastrointestinal decontaminat* 19. Selective decontaminat* 20. Topical decontaminat* 21. SOD 22. SDD 23. 12 or 13 or 14 or 15 or 16 or 17 or 18 or 19 or 20 or 21 or 22 24. 11 and 23 |
| * was used as truncation in PubMed, searching for multiple word variations and extensions |

| Table 1A Reason of exclusion in meta-analysis of studies, that are included in the systematic review | | | |
| --- | --- | --- | --- |
| Study | **Reason of exclusion** | **Study** | **Reason of exclusion** |
| Abele-Horn 1997 [23] | Data | **Leone 2003** [52] | Data |
| Benus 2010 [24] | Control group, overlapping patients with de Smet 2009 | **Lloréns-Villar 2019** [53] | Data |
| Bergmans 2001 [25] | Outcome measure | **Massart 2022** [54] | Overlapping patients with Massart 2023 and Reizine 2023 |
| van der Bij 2016 [26] | Overlapping patients with Houben 2014 and data | **Massart 2023** [55] | Overlapping patients with Massart 2022 and Reizine 2023 |
| Buitinck 2019 [28] | Control group | **Mathieu 2020** [56] | Control group |
| de la Cal 2005 [29] | Overlapping patients with de la Cal 2004 | **Muruzabal -Lecumberri 2015** [57] | Control group |
| Camus 2014 [32] | Overlapping patients with Camus 2005 | **Noteboom 2015** [58] | Control group |
| Camus 2016 [34] | Overlapping patients with Camus 2014 and control group | **Ochoa-Ardila 2011** [59] | Control group |
| Dautzenberg 2018 [37] | Control group | **Oostdijk 2010** [60] | Overlapping patients with de Smet 2011 |
| Godard 1990 [41] | Data | **Oostdijk 2013** [61] | Overlapping patients with de Smet 2011 |
| Halabay 2013 [42] | Control group | **Oostdijk 2014** [62] | Control group |
| Hammond 1995 [43] | Overlapping patients with Hammond 1992 and data | **Plantinga 2020** [64] | Overlapping patients with Wittekamp 2019 |
| Heininger 2006 [44] | Data | **Rocha 1992** [67] | Data |
| Houben 2014 [45] | Data | **Rodríguez-Gascón 2024** [68] | Data |
| Humphreys 1992 [46] | Data | **de Smet 2009** [4] | Overlapping patients with de Smet 2011 |
| Janssen 2020 [47] | Control group | **Tetteroo 1993** [72] | Control group |
| de Jonge 2018 [8] | Control group | **Ulrich 1989** [73] | Data |
| Landelle 2018 [50] | Control group | **Wittekamp 2015** [78] | Overlapping patients with de Smet 2009 and de Smet 2011 |
| Lendingham 1988 [51] | Data | **Young 2024** [79] | Overlapping data with SuDICCU 2022 |
| Study group. Studies were excluded because the study group was too small (<10 patients) Control group. Studies were excluded because there was no control group, or data on control group was missing Data. Studies were excluded because the data of the outcomes was either incomplete or it was not possible to analyse the given data in the meta-analysis. Overlapping patients. Studies were excluded because outcomes of patients in these studies were also analyzed in other mentioned studies | | | |

| Table 1B Reason of exclusion of studies from systematic review and meta-analysis after full-text assessment | | |
| --- | --- | --- |
| Study | **Reason of exclusion** | **Reference** |
| Al Naiemi 2005 | Study group | Al Naiemi N, Heddema ER, Bart A, et al. Emergence of multidrug-resistant Gram-negative bacteria during selective decontamination of the digestive tract on an intensive care unit. *J Antimicrob Chemother.* 2006;58(4):853-856. |
| van Beurden 2016 | Outcome measure | van Beurden YH, Dekkers OM, Bomers, et al. An Outbreak of Clostridium difficile Ribotype 027 Associated with Length of Stay in the Intensive Care Unit and Use of Selective Decontamination of the Digestive Tract: A Case Control Study. *PLoS One.* 2016;11(8):e0160778. |
| Bello Gonzalez 2017 | Study group | Bello Gonzalez TDJ, Pham P, Top J, et al. Characterization of Enterococcus Isolates Colonizing the Intestinal Tract of Intensive Care Unit Patients Receiving Selective Digestive Decontamination. *Front Microbiol.* 2017;8:1596. |
| Bion 1994 | Intervention | Bion JF, Badger I, Crosby HA, et al. Selective decontamination of the digestive tract reduces gram-negative pulmonary colonization but not systemic endotoxemia in patients undergoing elective liver transplantation. *Crit Care Med.* 1994;22(1):40-49. |
| Brown 2024 | Outcome measure | Brown A, Ferrando-Vivas P, Popa M, et al. Use of selective gut decontamination in critically ill children: PICnIC a pilot RCT and mixed-methods study. *Health Technol Assess*. 2024;28(8):1-84. |
| Buelow 2014 | Study group | Buelow E, Gonzalez TB, Versluis D, et al. Effects of selective digestive decontamination (SDD) on the gut resistome. *J Antimicrob Chemother*. 2014;69(8):2215-2223. |
| Buelow 2017 | Study group | Buelow E, Bello González TDJ, Fuentes S, et al. Comparative gut microbiota and resistome profiling of intensive care patients receiving selective digestive tract decontamination and healthy subjects. *Microbiome*. 2017;5(1):88. |
| Buitinck 2022 | Outcome measure | Buitinck SH, Jansen R, Bosman RJ, van der Meer NJM, van der Voort PHJ. Eradication of Resistant and Susceptible Aerobic Gram-Negative Bacteria From the Digestive Tract in Critically Ill Patients; an Observational Cohort Study. *Front Microbiol*. 2022 3;12:779805. |
| Candeloro 2012 | Intervention | Candeloro CL, Kelly LM, Bohdanowicz E, Martin CM, Bombassaro AM. Antimicrobial use in a critical care unit: a prospective observational study. *Int J Pharm* *Pract.* 2012; 20(3); 164-71 |
| Cockerill 1992 | Outcome measure | Cockerill FR 3rd, Muller SR, Anhalt JP, et al. Prevention of infection in critically ill patients by selective decontamination of the digestive tract. *Ann Intern Med.* 1992;117(7):545-53. |
| de la Court | Outcome measure | de la Court JR, Sigaloff KCE, Groot T, et al. Reducing the dosing frequency of selective digestive tract decontamination to three times daily provides effective decontamination of Gram-negative bacteria. *Eur J Clin Microbiol Infect Dis*. 2021;40(9):1843-1850. |
| Frencken 2019 | Outcome measure | Frencken JF, Wittekamp BHJ, Plantinga NL, et al. Associations Between Enteral Colonization With Gram-Negative Bacteria and Intensive Care Unit-Acquired Infections and Colonization of the Respiratory Tract. *Clin Infect Dis.* 2018;66(4):497-503. |
| Karvouniaris 2015 | Intervention | Karvouniaris M, Makris D, Zygoulis P, et al. Nebulised colistin for ventilator-associated pneumonia prevention. *Eur Respir J*. 2015;46(6):1732-1739. |
| Kirkwood 2017 | Intervention | Kirkwood KA, Gulack BC, Iribarne A, et al. A multi-institutional cohort study confirming the risks of Clostridium difficile infection associated with prolonged antibiotic prophylaxis. *J Thorac Cardiovasc Surg.* 2018;155(2):670-678. |
| Oostdijk 2013 | Outcome measure | Oostdijk EA, de Wit GA, Bakker M, de Smet AM, Bonten MJ; Dutch SOD-SDD trialists group. Selective decontamination of the digestive tract and selective oropharyngeal decontamination in intensive care unit patients: a cost-effectiveness analysis. *BMJ Open.* 2013;3(3):e002529. |
| Oudhuis 2010 | Outcome measure | Oudhuis GJ, Bergmans DC, Dormans T, et al. Probiotics versus antibiotic decontamination of the digestive tract: infection and mortality. *Intensive Care Med.* 2011;37(1):110-7. |
| Pathan 2023 | Outcome measure | Pathan N, Woolfall K, Popa M, et al.; PICNIC study investigators. Selective digestive tract decontamination to prevent healthcare associated infections in critically ill children: the PICNIC multicentre randomised pilot clinical trial. *Sci Rep*. 2023;13(1):21668. |
| Spatenkova 2018 | Intervention | Spatenkova V, Bradac O, Fackova D, Bohunova Z, Suchomel P. Low incidence of multidrug-resistant bacteria and nosocomial infection due to a preventive multimodal nosocomial infection control: a 10-year single centre prospective cohort study in neurocritical care. *BMC Neurol.* 2018;18(1):23. |
| Walker 2017 | Intervention | Walker S, Datta A, Massoumi RL, Gross ER, Uhing M, Arca MJ. Antibiotic stewardship in the newborn surgical patient: A quality improvement project in the neonatal intensive care unit. *Surgery.* 2017;162(6):1295-1303. |
| Wang 2018 | Intervention | Wang S, Han LZ, Ni YX, et al. Changes in antimicrobial susceptibility of commonly clinically significant isolates before and after the interventions on surgical prophylactic antibiotics (SPAs) in Shanghai. *Braz J Microbiol.* 2018;49(3):552-558. |
| Study group. Studies were excluded because the study group was too small (<10 patients) Outcome measure. Studies were excluded because the studies did not investigate outcomes meeting the inclusion criteria Intervention. Studies were excluded because the used intervention did not meet the inclusion criteria. *For references see table 1C | | |

| Table 2A Nature of topical agents used in SDD or SOD regimens | | | | | | | | | | | | |
| --- | --- | --- | --- | --- | --- | --- | --- | --- | --- | --- | --- | --- |
| Study | Topical agents | | | | | | | | | | | |
|  | **Amphotericin B** | **Colistin** | **Gentamicin** | **Neomycin** | **Nystatin** | **Polymixin B** | **Polymixin E** | **Tobramycin** | **Vancomycin** | **Nalidixic acid** | **Norfloxacin** | **Chloorhexidine body wash** |
| Studies included in the meta-analysis; | | | | | | | | | | | | |
| Brun-Buisson 1989[24] |  |  |  | x |  |  | x |  | x | x |  | xB |
| de la Cal 2004[26] | x |  |  |  |  |  | x | x | x |  |  | xC |
| Camus 2005[28] |  |  |  |  |  |  | x | x |  |  |  | xC |
| Camus 2014[30] | x |  |  |  |  |  | x | x |  |  |  | xC |
| Canter 2014[32] | x |  | x | x | x |  | x | x | x |  |  |  |
| Dahms 2000[33] |  |  |  |  | x |  |  |  |  |  | x |  |
| Ferrer 1994[35] | x |  |  |  |  |  | x | x |  |  |  |  |
| Flaherty 1990[36] |  |  | x |  | x |  | x |  |  |  |  |  |
| Garcin 2012[37] | x |  | x |  |  |  | x |  |  |  |  |  |
| Hammond 1992[40] | x |  |  |  |  |  | x | x |  |  |  |  |
| de Jonge 2003[3] | x |  |  |  |  |  | x | x |  |  |  |  |
| Katchman 2014[46] |  |  | x |  | x |  | x |  |  |  |  |  |
| Krueger 2002[47] |  |  | x |  |  | x |  |  | x |  |  |  |
| Perez-Granda 2018[61] |  |  |  |  | x |  | x | x | x |  |  | xC,D |
| Quinio 1996[63] | x |  | x |  |  |  | x |  |  |  |  |  |
| Reizine 2023[64] | x | x | x |  |  |  |  | x |  |  |  | x |
| Righi 2014[65] | x |  |  |  |  |  | x | x |  |  |  |  |
| Sánchez-García 1998[68] |  |  |  |  | x |  | x | x |  |  |  | xC,E |
| Sánchez-Ramîrez 2018[10] | x |  |  |  |  |  | x | x |  |  |  |  |
| de Smet 2011[69] |  | x |  |  | x |  |  | x |  |  |  |  |
| SuDDICU 2022[70] |  | x |  |  | x |  |  | x |  |  |  |  |
| Unertl 1987[73] | x |  | x |  |  | x |  |  |  |  |  |  |
| Verwaest 1997[74] | x |  |  |  |  |  | x | x |  |  | x |  |
| van der Voort 2004[75] | x |  |  |  |  |  | x | x |  |  |  |  |
| Wang 2022[76] | x | x | x |  | x |  |  |  |  |  |  |  |
| Wiener 1995[77] |  |  | x |  | x |  | x |  |  |  |  |  |
| Wittekamp 2018[9] |  |  |  |  | x |  | x | x |  |  |  | xC |
| Studies not included in meta-analysis; | | | | | | | | | | | | |
| Abele-Horn 1997[20] | x |  |  |  |  |  | x | x |  |  |  |  |
| Benus 2010[21] | x |  |  |  |  |  | x | x |  |  |  |  |
| Bergmans 2001[22] |  |  | x |  |  |  | x |  | x |  |  |  |
| van der Bij 2016[23] | x |  |  |  |  |  | x | x |  |  |  |  |
| Buitinck 2019[25] | x |  |  |  |  | x |  | x |  |  |  |  |
| de la Cal 2005[27] | x |  |  |  |  |  | x | x |  |  |  |  |
| Camus 2014[29] |  |  |  |  |  |  | x | x |  |  |  | xC |
| Camus 2016[31] | x |  |  |  |  |  | x | x |  |  |  | xC |
| Dautzenberg 2018[34] | x |  |  |  |  |  | x | x |  |  |  |  |
| Godard 1990[38] | x |  |  |  |  |  | x | x |  |  |  |  |
| Halaby 2013[39] | x |  |  |  |  |  | x | x |  |  |  |  |
| Hammond 1995[41] | x |  |  |  |  |  | x | x |  |  |  |  |
| Heininger 2006[42] | x |  |  |  |  |  | x | x |  |  |  |  |
| Houben 2014[43] | x |  |  |  |  |  | x | x |  |  |  |  |
| Humphreys 1992[44] | x |  |  |  |  |  | x | x |  |  |  |  |
| Janssen 2020[45] | x |  |  |  |  |  | x | x |  |  |  |  |
| de Jonge 2018[8] | x |  |  |  |  |  | x | x |  |  |  |  |
| Landelle 2018[48] |  |  |  |  | x |  | x | x |  |  |  | xD |
| Lendingham 1988[49] | x |  |  |  |  |  | x | x |  |  |  |  |
| Leone 2003[50] | x |  | x |  |  |  | x |  |  |  |  |  |
| Lloréns-Villar 2019[51] | x |  | x |  |  |  | x |  |  |  |  |  |
| Massart 2022[52] | x | x | x |  |  |  |  |  |  |  |  | x |
| Massart 2023[53] | x | x | x |  |  |  |  | x |  |  |  | x |
| Mathieu 2020[54] | x |  |  |  |  |  | x | x |  |  |  |  |
| Muruzabal -Lecumberri 2015[55] | x |  | x |  |  |  | x |  |  |  |  |  |
| Noteboom 2015[56] | x |  |  |  |  |  | x | x |  |  |  |  |
| Ochoa-Ardila 2011[57] | x |  |  |  |  |  | x | x |  |  |  |  |
| Oostdijk 2010[58] | x |  |  |  |  |  | x | x |  |  |  |  |
| Oostdijk 2013[59] | x |  |  |  |  |  | x | x |  |  |  |  |
| Oostdijk 2014[60] | x |  |  |  |  |  | x | x |  |  |  |  |
| Plantinga 2020[62] |  |  |  |  |  |  |  |  |  |  |  | xC,D |
| Rocha 1992[66] | x |  |  |  |  |  | x | x |  |  |  |  |
| Rodríguez-Gascón 2024[67] | x | x | x |  |  |  |  | x |  |  |  |  |
| de Smet 2009[4] | x |  |  |  |  |  | x | x |  |  |  |  |
| Tetteroo 1993[71] | x |  |  |  |  |  | x |  |  |  | x |  |
| Ulrich 1989[72] | x |  |  |  |  |  | x |  |  |  | x |  |
| Wittekamp 2015[78] | x |  |  |  |  |  | x | x |  |  |  |  |
| Young 2024[79] |  | x |  |  | x |  |  | x |  |  |  | xC,D |
| A. Data from Plantinga 2020 missing. B. Povidine-iodine solution C. Both intervention and control group. D. Only oral. E. Hexetidine. | | | | | | | | | | | | |

| Table 2B Nature of systemic agents used in SDD or SOD regimens | | | | | | | | | |
| --- | --- | --- | --- | --- | --- | --- | --- | --- | --- |
| Study | Systemic agents | | | | | | | | |
|  | **Cefazolin** | **Cefotaxime** | **Ceftazidime** | **Ceftriaxone** | **Ciprofloxacin** | **Erythromicin** | **Metronidazole** | **Norfloxacin** | **Trimethoprim** |
| Studies included in meta-analysis; | | | | | | | | | |
| Brun-Buisson 1989[24] |  |  |  |  |  |  |  |  |  |
| de la Cal 2004[26] |  | x |  |  |  |  |  |  |  |
| Camus 2005[28] |  |  |  |  |  |  |  |  |  |
| Camus 2014[30] |  |  |  |  |  |  |  |  |  |
| Canter 2014[32] |  | x |  |  |  | x |  |  |  |
| Dahms 2000[33] |  |  |  |  |  |  |  |  |  |
| Ferrer 1994[35] |  | x |  |  |  |  |  |  |  |
| Flaherty 1990[36] |  |  |  |  |  |  |  | x |  |
| Garcin 2012[37] | x |  |  |  |  |  |  |  |  |
| Hammond 1992[40] |  | xA |  |  |  |  |  |  |  |
| de Jonge 2003[3] |  | x |  | x |  |  |  |  |  |
| Katchman 2014[46] |  |  |  |  |  |  |  |  |  |
| Krueger 2002[47] |  |  |  |  | x |  |  |  |  |
| Perez-Granda 2018[61] |  |  |  |  |  |  |  |  |  |
| Quinio 1996[63] |  |  |  |  |  |  |  |  |  |
| Reizine 2023[64] | x | x |  |  |  |  |  |  |  |
| Righi 2014[65] |  | x |  |  |  |  |  |  |  |
| Sánchez-García 1998[68] |  | x |  |  |  |  |  |  |  |
| Sánchez-Ramîrez 2018[10] |  | x |  |  |  |  |  |  |  |
| de Smet 2011[69] |  | x | x | x | x |  |  |  |  |
| SuDDICU 2022[70] |  |  |  |  | x |  |  |  |  |
| Unertl 1987[73] |  |  |  |  |  |  |  |  |  |
| Verwaest 1997[74] |  | x |  |  |  |  |  | x |  |
| van der Voort 2004[75] |  | x |  |  |  |  |  |  |  |
| Wang 2022[76] |  |  |  |  |  |  |  |  |  |
| Wiener 1995[77] |  |  |  |  |  |  |  |  |  |
| Wittekamp 2018[9] |  |  |  |  |  |  |  |  |  |
| Studies not included in meta-analysis; | | | | | | | | | |
| Abele-Horn 1997[20] |  | x |  |  |  |  |  |  |  |
| Benus 2010[21] |  | x |  |  |  |  |  |  |  |
| Bergmans 2001[22] |  |  |  |  |  |  |  |  |  |
| van der Bij 2016[23] |  | x |  | x |  |  |  |  |  |
| Buitinck 2019[25] |  | x |  |  |  |  |  |  |  |
| de la Cal 2005[27] |  | x |  |  |  |  |  |  |  |
| Camus 2014[29] |  |  |  |  |  |  |  |  |  |
| Camus 2016[31] |  |  |  |  |  |  |  |  |  |
| Dautzenberg 2018[34] |  | x |  |  |  |  |  |  |  |
| Godard 1990[38] |  |  |  |  |  |  |  |  |  |
| Halaby 2013[39] |  |  |  |  |  |  |  |  |  |
| Hammond 1995[41] |  | xA |  |  |  |  |  |  |  |
| Heininger 2006[42] |  |  |  |  |  |  |  |  |  |
| Houben 2014[43] |  | x |  |  |  |  |  |  |  |
| Humphreys 1992[44] |  |  | x |  |  |  |  |  |  |
| Janssen 2020[45] |  | x |  |  |  |  |  |  |  |
| de Jonge 2018[8] |  | x |  |  |  |  |  |  |  |
| Landelle 2018[48] |  |  |  |  |  |  |  |  |  |
| Lendingham 1988[49] |  | x |  |  |  |  |  |  |  |
| Leone 2003[50] | x |  |  |  |  |  |  |  |  |
| Lloréns-Villar 2019[51] |  |  |  | x |  |  |  |  |  |
| Massart 2022[52] |  |  |  |  |  |  |  |  |  |
| Massart 2023[53] |  |  |  |  |  |  |  |  |  |
| Mathieu 2020[54] | x |  |  |  |  |  |  |  |  |
| Muruzabal -Lecumberri 2015[55] |  |  |  | x |  |  |  |  |  |
| Noteboom 2015[56] |  | x |  | x |  |  |  |  |  |
| Ochoa-Ardila 2011[57] |  | x |  |  |  |  |  |  |  |
| Oostdijk 2010[58] |  | x |  |  |  |  |  |  |  |
| Oostdijk 2013[59] |  | x |  |  |  |  |  |  |  |
| Oostdijk 2014[60] |  | x |  | x |  |  |  |  |  |
| Plantinga 2020[62] |  |  |  |  |  |  |  |  |  |
| Rocha 1992[66] |  | x |  |  |  |  |  |  |  |
| Rodríguez-Gascón 2024[67] |  |  |  | x |  |  |  |  |  |
| de Smet 2009[4] |  | x |  |  |  |  |  |  |  |
| Tetteroo 1993[71] |  | x |  |  |  |  |  |  |  |
| Ulrich 1989[72] |  |  |  |  |  |  |  |  | x |
| Wittekamp 2015[78] |  | x |  |  |  |  |  |  |  |
| Young 2024[79] |  |  |  |  |  |  |  |  |  |
| A. Both intervention and control group received cefotaxime B. Both entire intervention and control group received standardized cefalozine and metronidazole before operation, not as part of SDD or SOD C. Data from Plantinga 2020 is missing. D. SuDDICU trial used either 3rd generation cephalosporines or ciprofloxacin, however no specifications on 3rd generation cephalosporines is given | | | | | | | | | |

| Figure 2 Risk of bias assessment of studies included in systematic review on antimicrobial resistance after SSD or SOD in ICU patients using MINORS-checklist |
| --- |
|  |
| Red. 0 (not reported) Yellow. 1 (reported but inadequate) Green. 2 (reported and adequate). The global ideal score being 16 for non-comparative studies and 24 for comparative studies. (15) Empty cells represent non applicable criteria for those specific studies |

| Table 3 | |
| --- | --- |
| Study | **Multidrug resistant (MDR) definition** |
| Camus 2014 [33] | Aerobic gram-negative bacteria resistant to two or more antimicrobial agents |
| Perez-Granda 2018 [63] | Gram-negative bacteria producing carbapenemase, *P. aeruginosa* extensively drug-resistant and *S. aureus* resistant to methicillin |
| Reizine 2023 [65] | *S. aureus* resistant to methicillin or intermediate resistant to glycopeptide, *Enterococcus* spp. resistant to glycopeptide or extended-spectrum beta-lactamase producing *Enterobacterales* (ESBLE) |
| Righi 2014 [66] | *S. aureus* resistant to methicillin, *Enterococcus* spp. resistant to glycopeptide, *Enterobacter* spp. resistant to fluoroquinolons or carbapenems or ESBLE, *Pseudomonas* spp. and *B. cepacia* resistant to carbapenems or piperacillin-tazobactam, or *A. baumannii* sensitive to only colistin and tigecycline. Stenotrophomonas maltophilia was always considered as an MDR bacteria for its intrinsic resistance to antibiotics. |
| van der Voort 2004 [75] | *Enterobacteriaceae*, *Pseudomonas* spp., *Stenotrophomonas* spp., or *Acinetobacter* spp. resistant to three or more of the following antibiotics: amoxicillin-clavulanic acid (only for Enterobacteriaceae), trimethoprim-sulfamehtoxazole, at least one aminoglycoside, ciprofloxacin, piperacillin, third-generation cephalosporin or meropenem/imipenem. |
| Wittekamp 2018 [9] | *Enterobacteriaceae* resistant to third-generation cephalosporins or gram-negative bacteria resistant to carbapenems, colistin, or 3 or more antibiotics. |

| Fig. 3A-B Sensitivity analysis on studies administering IV antibiotics versus not |
| --- |
|  |
| A. Studies administering IV antibiotics as a part of SDD or SOD B. Studies not administering IV antibiotics as a part of SDD or SOD. An odds ratio <1 suggests a protective effect and an odds ratio >1 suggests a risk-inducing effect. |

| Fig. 4A-B Sensitivity analysis conducted in countries with on studies with low antimicrobial resistance prevalence vs. intermediate or high |
| --- |
|  |
| A. Studies conducted in countries with low antimicrobial resistance prevalence B. Studies conducted in countries with intermediate or high antimicrobial resistance prevalence An odds ratio <1 suggests a risk-inducing effect and an odds ratio >1 suggests a causal effect. |

| Fig. 5A-B Sensitivity analysis on studies performing routine swabs versus not |
| --- |
|  |
| A. Studies performing routine swabs B. Studies not performing routine swabs in both intervention and control group. An odds ratio <1 suggests a protective effect and an odds ratio >1 suggests a risk-inducing effect. |

| Fig. 6A-B Sensitivity analysis on studies using individually and cluster randomized versus observational design |
| --- |
|  |
| A. Studies with a randomized design B. Studies with an observational design. An odds ratio <1 suggests a protective effect and an odds ratio >1 suggests a risk-inducing effect. |

| Fig. 7A-B Sensitivity analysis on studies using individually randomized versus cluster randomized and observational design |
| --- |
|  |
| A. Studies with an individually randomized B. Studies with a cluster randomized and observational design. An odds ratio <1 suggests a protective effect and an odds ratio >1 suggests a risk-inducing effect. |

| Fig. 8A-B Sensitivity analysis on studies using data from <2012 versus >2012 |
| --- |
|  |
| A. Studies from before 2010 B. Studies after 2010. An odds ratio <1 suggests a protective effect and an odds ratio >1 suggests a risk-inducing effect. |

| Fig 9A-B Sensitivity analysis on studies with follow-up <14days versus follow-up >14 days |
| --- |
|  |
| A. Studies with a shorter follow-up than 14 days B. Studies with a longer follow-up than 14 days. An odds ratio <1 suggests a protective effect and an odds ratio >1 suggests a risk-inducing effect. |

| Fig. 10 Funnelplot of identified studies included in the meta-analysis on antibiotic resistance after SDD or SOD in ICU patients |
| --- |
|  |
| X-axis Risk ratio Y-axis Standard Error Dark grey area is a p-value between 0.1 and 0.05 Medium grey area is a p-value between 0.05 and 0.01 Light grey area is a p-value less than 0.01 |

| Fig. 11 Visual inference: Random null-hypothesis of no publication bias funnel plots are shown |
| --- |
|  |
| Number 6 is the original funnel plot in the visual inference. |
